# Supplementary material for: Characteristics of circulatory failure after out-of-hospital cardiac arrest: a prospective cohort study
Source: PubMed Central journal article supplement — Open Heart. 2022 Jan 19;9(1):e001890. doi: 10.1136/openhrt-2021-001890 (PMC8772457; doi:10.1136/openhrt-2021-001890), 2022-01-19
Supplement: openhrt-2021-001890supp001.pdf [file openhrt-2021-001890supp001.pdf]

**Supplementary table 1.** Demography for all subgroups

| Characteristics of patients                           | IL-6          |              | Syndecan-1    |               | CRP           |               | Pro-BNP       |               | Troponin-T    |               |
|-------------------------------------------------------|---------------|--------------|---------------|---------------|---------------|---------------|---------------|---------------|---------------|---------------|
|                                                       | High          | Low          | High          | Low           | High          | Low           | High          | Low           | High          | Low           |
|                                                       | n = 17 (41 %) | n = 25 (59%) | n = 19 (45 %) | n = 23 (55 %) | n = 17 (41 %) | n = 25 (59 %) | n = 16 (39 %) | n = 26 (61 %) | n = 18 (43 %) | n = 24 (57 %) |
| Age, years, mean (SD)                                 | 67 (16)       | 63 (14)      | 65 (13)       | 64 (16)       | 65 (11)       | 65 (17)       | 69 (9)        | 62 (17)       | 60 (12)       | 68 (16)       |
| Male sex, no (%)                                      | 15 (88)       | 20 (80)      | 16 (84)       | 19 (82)       | 14 (82)       | 21 (84)       | 13 (81)       | 22 (84)       | 16 (88)       | 19 (79)       |
| Body mass index, mean (SD)                            | 30 (10)       | 26 (4)       | 29 (10)       | 27 (4)        | 28 (10)       | 27 (4)        | 26 (4)        | 29 (9)        | 26 (4)        | 29 (9)        |
| CCI, points, median (IQR)                             | 4 (2)         | 3 (2)        | 3 (2)         | 3 (3)         | 3 (3)         | 4 (4)         | 4 (2)         | 3 (3)         | 3 (3)         | 4 (3)         |
| Witnessed cardiac arrest, no. (%)                     | 15 (88)       | 19 (76)      | 17 (89)       | 17 (74)       | 14 (82)       | 20 (80)       | 15 (93)       | 19 (73)       | 15 (83)       | 19 (79)       |
| Bystander CPR, no (%)                                 | 16 (94)       | 21 (86)      | 17 (89)       | 20 (87)       | 14 (82)       | 23 (92)       | 14 (88)       | 23 (88)       | 14 (77)       | 23 (96)       |
| Time <sup>1</sup> to ACLS, min, median (IQR)          | 10 (9)        | 11 (12)      | 10 (13)       | 11 (9)        | 10 (8)        | 11 (13)       | 11 (8)        | 10 (12)       | 11 (13)       | 10 (8)        |
| Shockable initial rhythm, no. (%)                     | 15 (88)       | 16 (64)      | 15 (79)       | 16 (69)       | 14 (82)       | 17 (68)       | 13 (81)       | 18 (69)       | 16 (89)       | 15 (62)       |
| Time <sup>1</sup> to ROSC, min., median (IQR)         | 26 (16)       | 26 (16)      | 26 (16)       | 24 (16)       | 29 (13)       | 23 (16)       | 26 (20)       | 24 (15)       | 30 (13)       | 20 (15)       |
| Presumed cardiac etiology, no. (%)                    | 15 (88)       | 19 (76)      | 16 (84)       | 18 (78)       | 15 (88)       | 19 (76)       | 15 (93)       | 19 (73)       | 17 (94)       | 17 (71)       |
| Circulatory shock in ER <sup>2</sup> , no. (%)        | 7 (41)        | 11 (44)      | 7 (37)        | 11 (48)       | 8 (47)        | 10 (40)       | 5 (31)        | 13 (56)       | 10 (55)       | 8 (33)        |
| Certain pulmonary aspiration, no. (%)                 | 5 (29)        | 4 (16)       | 5 (26)        | 4 (17)        | 5 (29)        | 4 (16)        | 2 (13)        | 7 (27)        | 2 (11)        | 7 (29)        |
| Time <sup>1</sup> to ICU admission, min, median (IQR) | 142(46)       | 128 (65)     | 130 (56)      | 147 (66)      | 142 (39)      | 127 (58)      | 139 (117)     | 131 (46)      | 139 (84)      | 125 (58)      |
| Initial pH, median (IQR)                              | 7.24 (0.09)   | 7.21 (0.25)  | 7.24 (0.23)   | 7.23 (0.27)   | 7.20 (0.23)   | 7.24 (0.13)   | 7.26 (0.26)   | 7.20 (0.22)   | 7.24 (0.23)   | 7.24 (0.23)   |
| Initial base excess, mmol/L, median (IQR)             | -7.6 (-5)     | -13 (-8)     | -11 (-8)      | -9 (-8)       | -11 (-11)     | -9 (-7)       | -9 (-7)       | -11 (-9)      | -11 (-6)      | -9 (-10)      |
| Initial lactate level, mmol/L, median (IQR)           | 5 (4)         | 8 (8)        | 7 (9)         | 5 (7)         | 6 (8)         | 6 (6)         | 4 (6)         | 7 (8)         | 5 (5)         | 7 (9)         |
| SAPS 2, score, mean (SD)                              | 72 (11)       | 65 (13)      | 70 (10)       | 66 (14)       | 66 (11)       | 69 (14)       | 69 (10)       | 64 (14)       | 65 (12)       | 70 (13)       |
| PCI, no (%)                                           | 8 (47)        | 9 (36)       | 9 (47)        | 8 (35)        | 9 (53)        | 8 (32)        | 5 (31)        | 12 (46)       | 13 (72)       | 4 (17)        |

Supplementary table 1. (Continued)

| Characteristics of patients    | IL-6                  |                     | Syndecan-1            |                      | CRP                   |                      | Pro-BNP               |                      | Troponin-T            |                      |
|--------------------------------|-----------------------|---------------------|-----------------------|----------------------|-----------------------|----------------------|-----------------------|----------------------|-----------------------|----------------------|
|                                | High<br>n = 17 (41 %) | Low<br>n = 25 (59%) | High<br>n = 19 (45 %) | Low<br>n = 23 (55 %) | High<br>n = 17 (41 %) | Low<br>n = 25 (59 %) | High<br>n = 16 (39 %) | Low<br>n = 26 (61 %) | High<br>n = 18 (43 %) | Low<br>n = 24 (57 %) |
| LVEF $\geq$ 40 %, n (%)        | 11 (65)               | 19 (36)             | 14 (73)               | 16 (69)              | 12 (70)               | 18 (72)              | 9 (56)                | 21 (80)              | 14 (77)               | 16 (66)              |
| LVFS, %, mean (SD)             | 25 (11)               | 29 (10)             | 27 (11)               | 28 (11)              | 25 (11)               | 29 (10)              | 22 (11)               | 31 (8)               | 29 (9)                | 26 (11)              |
| WMSI, score, median (IQR)      | 1.3 (0.8)             | 1.6 (0.7)           | 1.6 (0.7)             | 1.4 (0.7)            | 1.3 (0.8)             | 1.6 (0.7)            | 1.8 (0.5)             | 1.2 (0.8)            | 1.4 (0.6)             | 1.8 (0.85)           |
| LVOT-VTI, cm, mean (SD)        | 16 (5)                | 17 (4)              | 15 (5)                | 17 (4)               | 16 (4)                | 17 (5)               | 14 (3)                | 18 (4)               | 17 (4)                | 16 (4)               |
| TAPSE, mm, mean (SD)           | 16 (4)                | 20 (4)              | 18 (4)                | 19 (4)               | 17 (4)                | 20 (5)               | 17 (4)                | 20 (4)               | 19 (4)                | 18 (4)               |
| Days in ICU, median (IQR)      | 11 (8)                | 6 (7)               | 10 (12)               | 7 (9)                | 10 (7)                | 5 (9)                | 12 (7)                | 6 (8)                | 11 (8)                | 6 (9)                |
| Days in hospital, median (IQR) | 19 (11)               | 11 (10)             | 16 (17)               | 12 (17)              | 15 (17)               | 13 (16)              | 18 (20)               | 11 (15)              | 16 (19)               | 12 (15)              |
| 30-days mortality, no. (%)     | 4 (23)                | 11 (44)             | 7 (37)                | 8 (35)               | 6 (35)                | 9 (36)               | 5 (31)                | 10 (38)              | 4 (22)                | 11 (46)              |

<sup>1</sup> Time from emergency call to event.

<sup>2</sup> Systolic blood pressure <90 mmHg or in need of fluids and/or vasopressors to maintain systolic blood pressure >90 mmHg.

ACLS: advanced cardiovascular life support; CCI: Charlson comorbidity index ; CPR: cardiopulmonary resuscitation; ER: emergency room; IQR: interquartile range; LVEF: left ventricular ejection fraction; LVFS: left ventricular fractional shortening; LVOT-VTI: left ventricular outflow tract velocity time integral; PCI: percutaneous coronary intervention; ROSC: return of spontaneous circulation; SAPS: Simplified Acute Physiology Score; SD: standard deviation; TAPSE: tricuspid annular plane systolic excursion; WMSI: wall motion score index.
