# Supplementary material for: Characteristics of circulatory failure after out-of-hospital cardiac arrest: a prospective cohort study
Source: PubMed Central journal article supplement — Open Heart. 2022 Jan 19;9(1):e001890. doi: 10.1136/openhrt-2021-001890 (PMC8772457; doi:10.1136/openhrt-2021-001890), 2022-01-19
Supplement: openhrt-2021-001890supp002.pdf [file openhrt-2021-001890supp002.pdf]

**Supplementary table 2.** Echocardiographic evaluation during first 24 hours

| Measurements                                                         | n = 38        |
|----------------------------------------------------------------------|---------------|
| Left ventricular posterior wall thickness, mm, mean (SD)             | 11 (2)        |
| Septal thickness, mm, mean (SD)                                      | 11 (2)        |
| Left ventricular end-diastolic dimension, mm, mean (SD)              | 50 (10)       |
| Left ventricular end-systolic dimension, mm, mean (SD)               | 37 (12)       |
| Left ventricular ejection fraction, n (%)                            |               |
| <20 %                                                                | 2 (5)         |
| 20 – <30 %                                                           | 3 (8)         |
| 30 – <40 %                                                           | 7 (18)        |
| 40 – <50 %                                                           | 13 (35)       |
| 50 – <60 %                                                           | 11 (29)       |
| ≥60 %                                                                | 2 (5)         |
| Left ventricular fractional shortening, %, mean (SD)                 | 27 (10)       |
| Wall motion score index, score, median (Q1–Q3)                       | 1.5 (1.1–1.8) |
| Left ventricular outflow tract velocity time integral, cm, mean (SD) | 16.6 (4.3)    |
| Right ventricular basal diameter, mm, mean (SD)                      | 39.4 (6.4)    |
| Tricuspid annular plane systolic excursion, mm, mean (SD)            | 18.5 (4.3)    |
| ST-elevated myocardial infarction                                    | 21 (55)       |
| Non-ST-elevated myocardial infarction                                | 1 (2)         |
| Old myocardial infarction, n (%)                                     | 6 (16)        |
| Valvular pathology <sup>1,2</sup>                                    | 13 (34)       |

<sup>1</sup> Excluding mild tricuspid valve insufficiency.

<sup>2</sup> One mild aortic valve stenosis; one moderate aortic valve insufficiency; six mild and one moderate mitral valve insufficiency; three moderate and one severe tricuspid valve insufficiency.

SD: standard deviation; Q1–Q3: first to third quartile.
