# Supplementary figures and images for: Characteristics of circulatory failure after out-of-hospital cardiac arrest: a prospective cohort study
Source: PubMed Central journal article supplement — Open Heart. 2022 Jan 19;9(1):e001890. doi: 10.1136/openhrt-2021-001890 (PMC8772457; doi:10.1136/openhrt-2021-001890), 2022-01-19

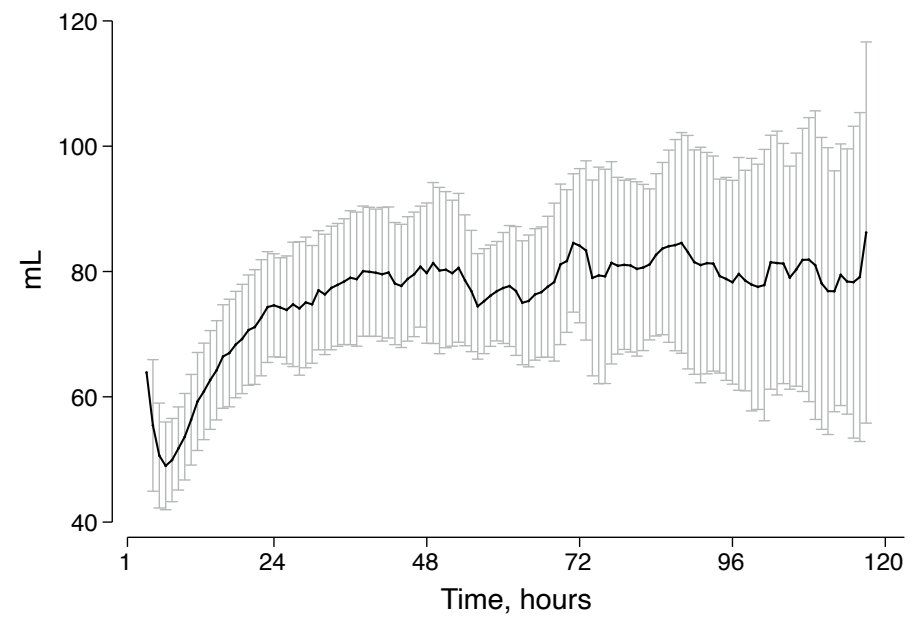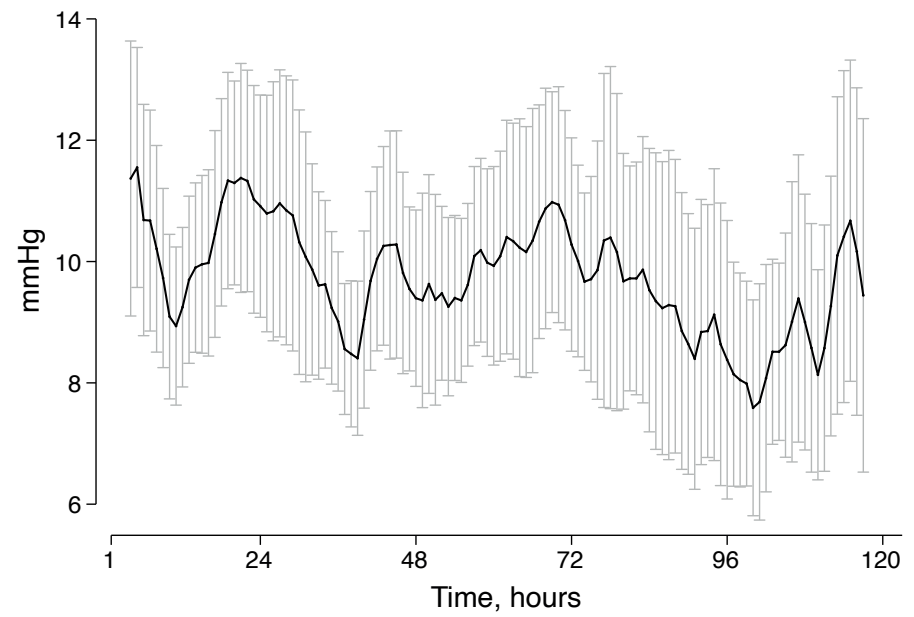

Supplement: openhrt-2021-001890supp003.pdf [file openhrt-2021-001890supp003.pdf]

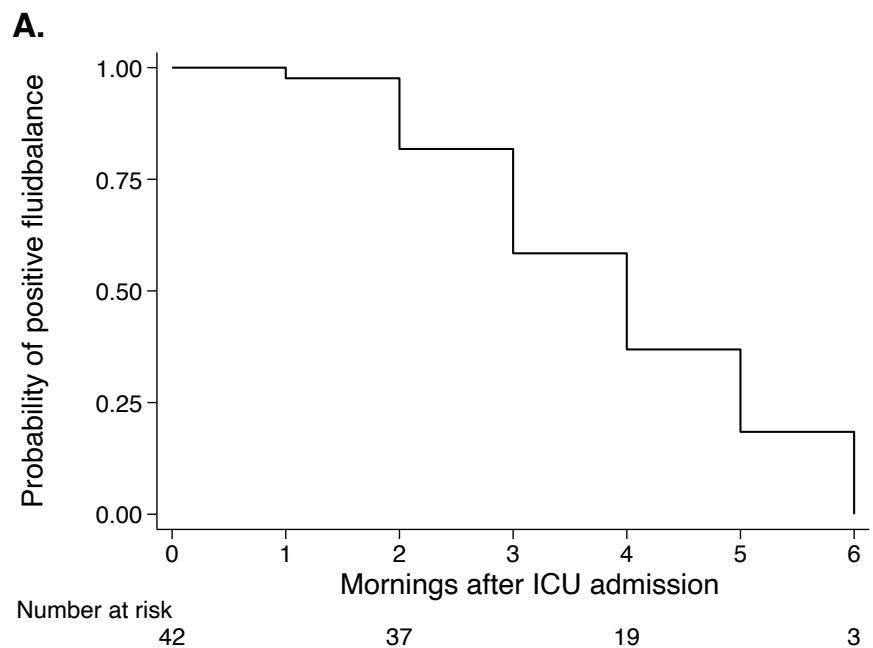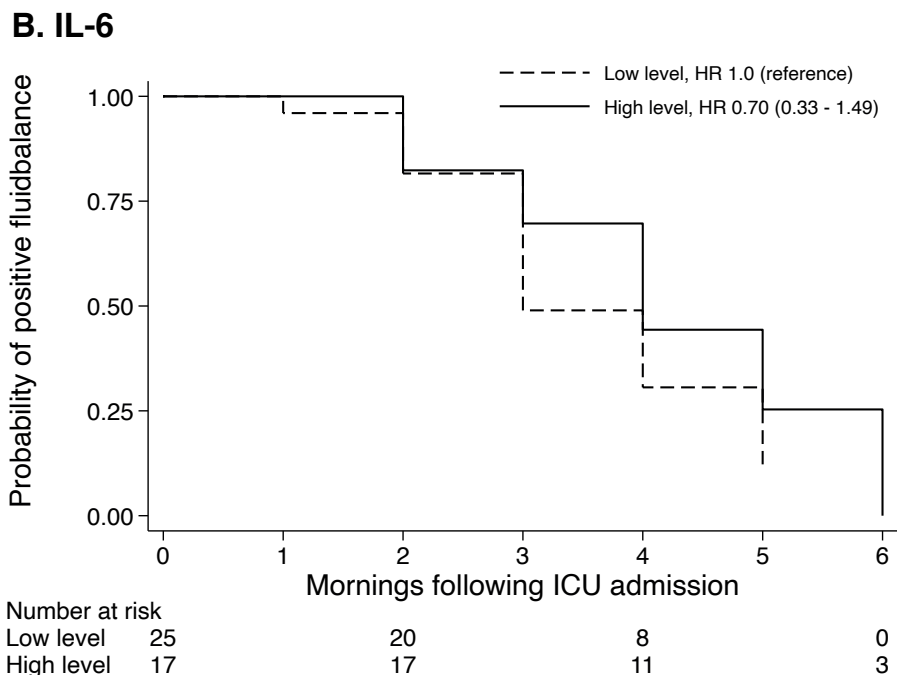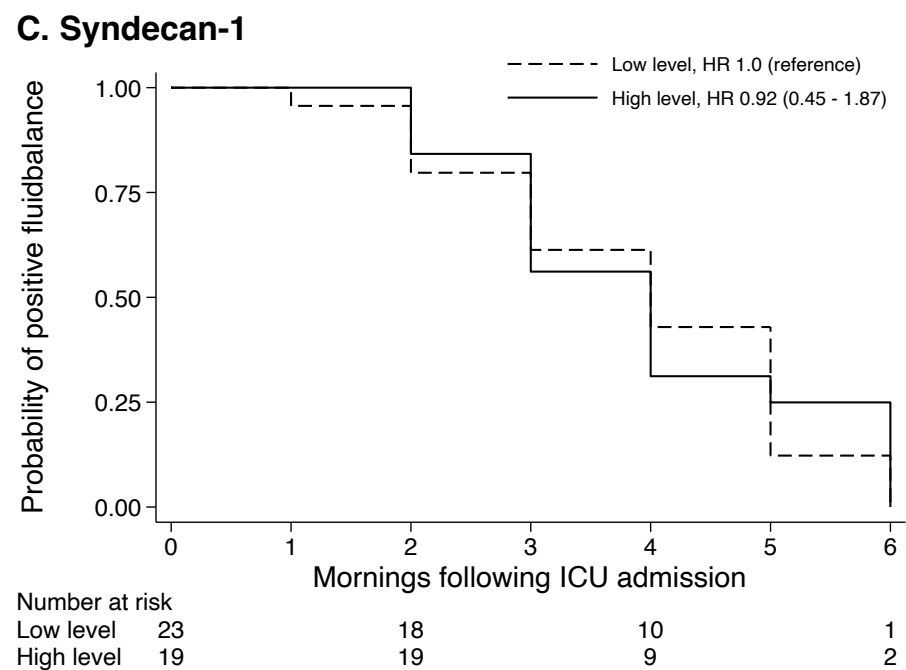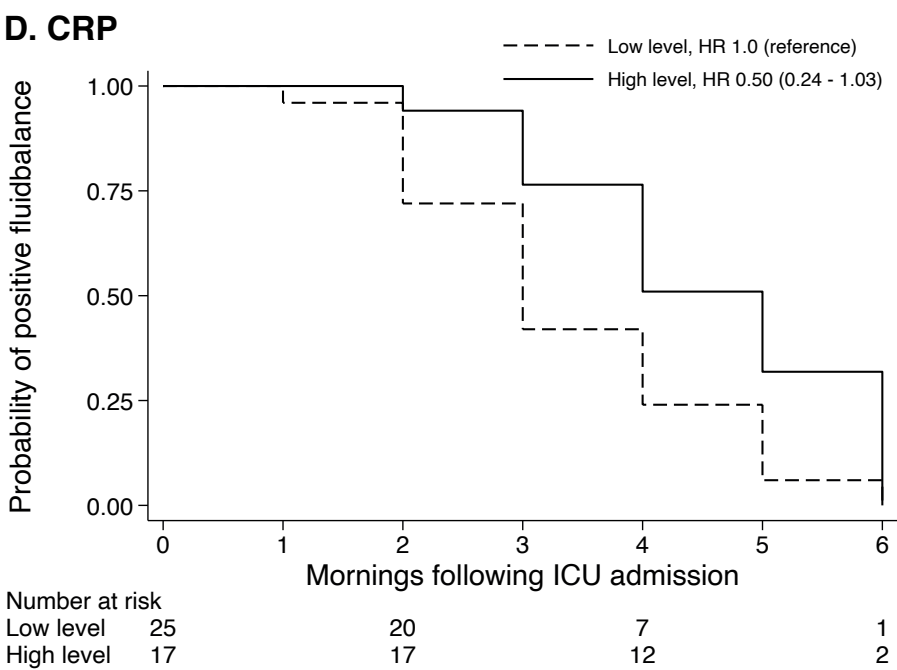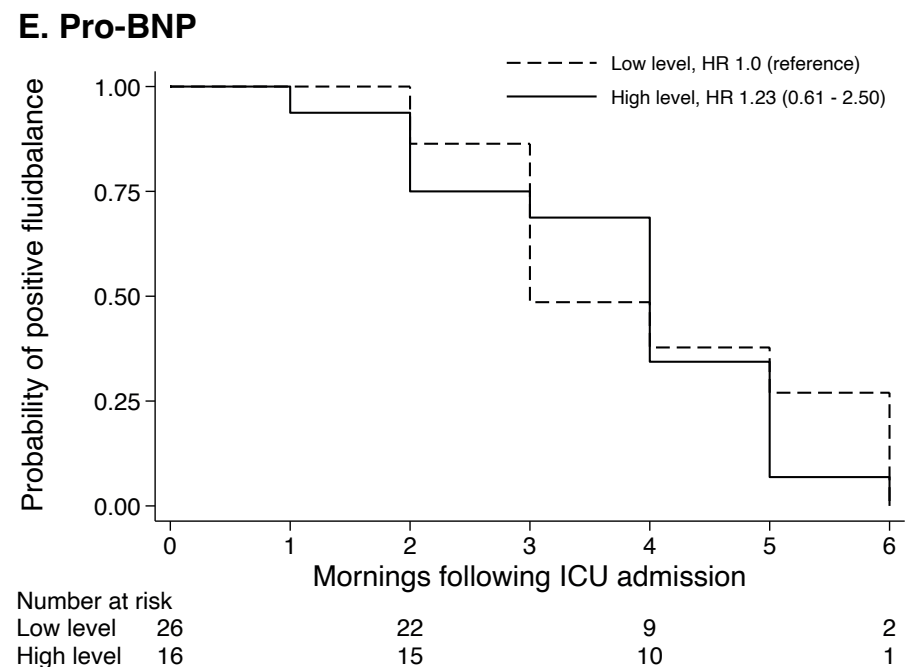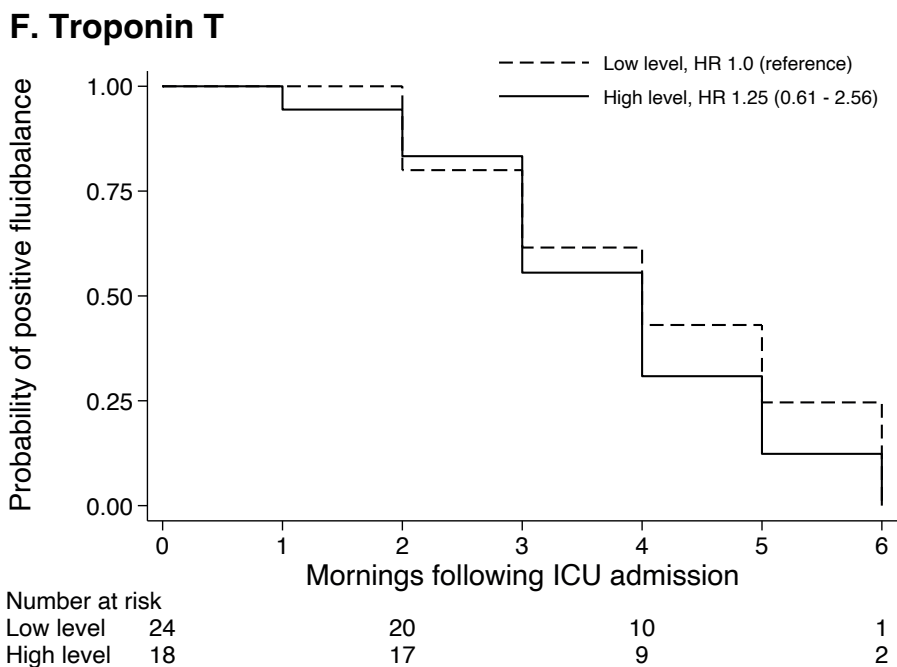

Supplement: openhrt-2021-001890supp004.pdf [file openhrt-2021-001890supp004.pdf]

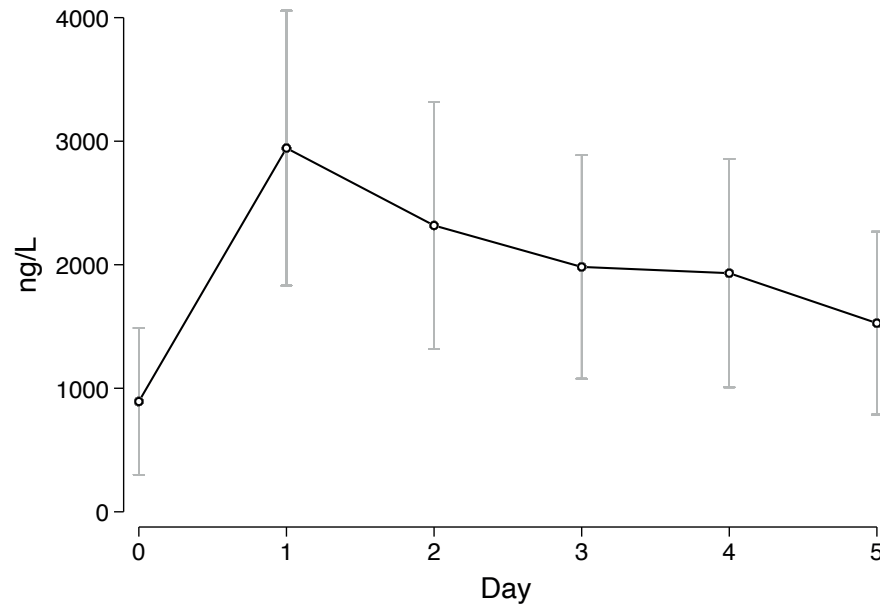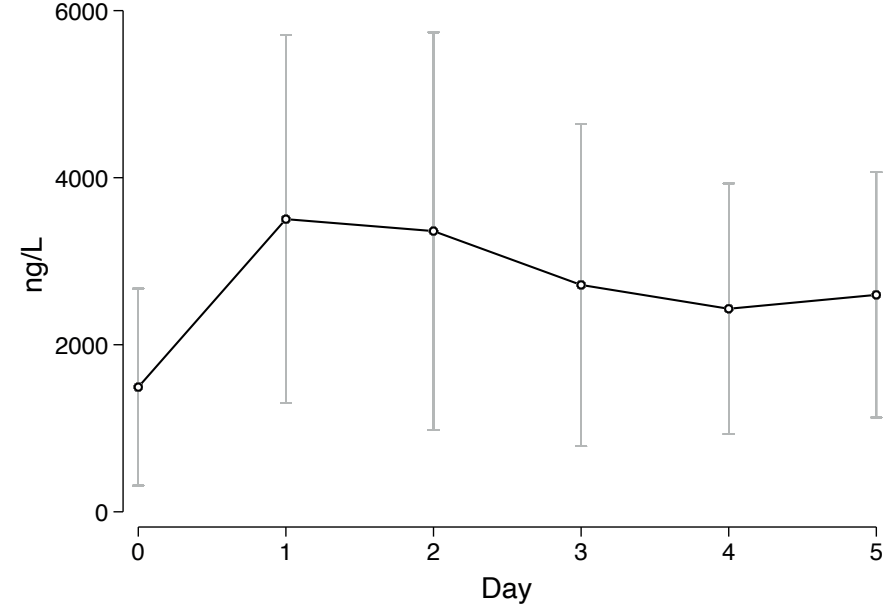

Supplement: openhrt-2021-001890supp005.pdf [file openhrt-2021-001890supp005.pdf]
